## **Urologia Internationalis**

# Urologia Internationalis

Founded by PETER A. NARATH (1955–1962) and HEINRICH HEUSSER (1955–1967)

Editor

G. MAYOR, Zürich

Editorial Board

C. E. ALKEN, Homburg, Saar  
J. J. ALVAREZ IERENA, Mexico  
R. ANDERSEN, Oslo  
J. AUVERT, Paris  
A. BABICS, Budapest  
P. BISCHOFF, Hamburg  
J. BISQUERTT, Santiago  
H. BOEMINGHAUS, Düsseldorf  
E. BORS, Cave Creek, Ariz.  
K. BOSHAMER, Bad Dürkheim  
P. BRUNI, Napoli  
TH. BURGHELE, Bucharest  
M. CAINE, Jerusalem  
A. CARNEIRO DE MOURA, Lisbon  
J. C. CHRISTOFFERSEN, Copenhagen  
L. CIFUENTES-DELATTE, Madrid  
P. J. DENNEHY, Johannesburg  
P. DEUTICKE, Wien  
A. R. EL-SADR, Alexandria  
J. D. FERGUSON, London  
R. DE FREITAS, São Paulo  
G. GIERTZ, Stockholm  
S. GIL VERNET, Barcelona  
H. U. GLOOR, Zürich  
W. E. GOODWIN, Los Angeles, Cal.  
W. GRÉGOIR, Bruxelles  
L. H. GRIFFITHS, London  
H. G. HANLEY, London  
F. HINMAN, Jr., San Francisco, Cal.  
H. HOUTAPPEL, Amsterdam  
F. A. HUGHES, Montevideo  
A. R. KÜSS, Paris

T. KUSUNOKI, Osaka  
J. LANGE, Bordeaux  
W. F. LEADBETTER, Boston, Mass.  
E. LJUNGGREN, Göteborg  
L. LOPEZ, Caracas  
S. A. MACDONALD, Montreal  
H. MARBERGER, Innsbruck  
R. I. MATHIS, Buenos Aires  
F. MAY, München  
E. MICHALOWSKI, Kraków  
J. MOMBAERTS, Bruxelles  
H. MORTENSEN, Melbourne  
A. MOULONGUET, Paris  
A. OBERHOLTZER, Rome  
O. OBRANT, Hälsingborg  
V. PAČES, Prague  
E. PÉREZ-CASTRO, Madrid  
S. PETROVIĆ, Belgrade  
A. PUIGVERT, Barcelona  
L. N. PYRAH, Leeds  
A. PYTEL, Moscow  
L. QUÉNU, Paris  
G. RAVASINI, Padova  
D. R. SMITH, San Francisco, Cal.  
H. TAKAYASU, Hongo  
F. TSUCHIYA, Tokyo  
R. D. TURNER, Los Angeles, Cal.  
R. ÜBELHÖR, Wien  
A. VILLANUEVA, Mexico City  
W. F. WHITMORE, New York, N.Y.  
E. WILDBOLZ, Bern  
D. I. WILLIAMS, London

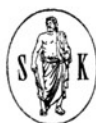

S. Karger · Basel · München · Paris · London · New York · Sydney  
Arnold-Böcklin-Strasse 25, CH-4051 Basel (Switzerland)

---

All rights, including that of translation into other languages, reserved.  
Photomechanic reproduction (photocopy, microcopy) of this volume or parts thereof  
without special permission of the publishers is prohibited.

© Copyright 1971 by S. Karger AG, Verlag für Medizin und Naturwissenschaften, Basel  
Printed in Switzerland by Buchdruckerei National-Zeitung AG, Basel  
Blocks: Abereg-Steiner & Co. AG, Berne

## Index

|                                                                                                                                                                                                                                                                               |     |
|-------------------------------------------------------------------------------------------------------------------------------------------------------------------------------------------------------------------------------------------------------------------------------|-----|
| ALBRECHT, K. F.; HAHN, M. und BRINKMANN, B.: Die Entfernung von Korallensteinen durch grosse longitudinale Nephrotomie (sogenannter Sektionschnitt) – Removal of Staghorn Calculi by Large Longitudinal Nephrotomy (So-called Section-Incision). . . . .                      | 122 |
| ARAP, S.; CABRAL, A. D.; DE CAMPOS FREIRE, J. G.; GREGOIR, W., and VAN REGEMORTER, G.: The Extra-Vesical Antireflux Plasty. Statistical Analysis. . . . .                                                                                                                     | 241 |
| ASO, Y.: vide TAKAYASU, H.                                                                                                                                                                                                                                                    |     |
| ASZTALOS, B.: vide VÁRY, L.                                                                                                                                                                                                                                                   |     |
| AUVERT, J.: vide WAGENKNECHT, L. V.                                                                                                                                                                                                                                           |     |
| BALOGH, F.: vide VÁRY, L.                                                                                                                                                                                                                                                     |     |
| BÁRD, R.: vide VÁRY, L.                                                                                                                                                                                                                                                       |     |
| BAUER, U.: vide SCHOENENBERGER, G. A.                                                                                                                                                                                                                                         |     |
| BICHLER, K. H.; DEPPE, H.-U.; MEWE, F. und SCHENCK, K.: Fremdkörperverletzungen der Harnröhre und der Harnblase bei Jugendlichen. Ihre sexualpsychologischen Hintergründe – Foreign Body Injuries of Urethra and Bladder in the Young. Their Psychosexual Background. . . . . | 161 |
| BOCHKOR, B.: vide VÁRY, L.                                                                                                                                                                                                                                                    |     |
| BOULOS, BADI M. and HASSANEIN, KHATAB M.: Comparison Between the Amniotic Fluid and Fetal Urine in the Last Trimester of Pregnancy. . . . .                                                                                                                                   | 138 |
| BOYARSKI, S.; LABAY, P., and ESCALANTE, O.: Surgical Implications of Ureteral Neurology . . . . .                                                                                                                                                                             | 325 |
| BRADLEY, W. E.; TIMM, G. W., and CHOU, S. N.: A Decade of Experience with Electronic Simulation of the Micturition Reflex . . . . .                                                                                                                                           | 283 |
| BREHMER, B.: vide KIERFELD, G.                                                                                                                                                                                                                                                |     |
| BRINKMANN, B.: vide ALBRECHT, K. F.                                                                                                                                                                                                                                           |     |
| CABRAL, A. D.: vide ARAP, S.                                                                                                                                                                                                                                                  |     |
| CARAMIA, G.: vide PAVONE-MACALUSO, M.                                                                                                                                                                                                                                         |     |
| CERNAY, L.: vide KOCSIS, J.                                                                                                                                                                                                                                                   |     |
| CHOU, S. N.: vide BRADLEY, W. E.                                                                                                                                                                                                                                              |     |
| CUENI, L. B.: vide SCHOENENBERGER, G. A.                                                                                                                                                                                                                                      |     |
| DAVIDTS, H.: Die primäre lokalisierte Amyloidose der Harnblase – Primary Localized Amyloidosis of Urinary Bladder . . . . .                                                                                                                                                   | 252 |
| DE CAMPOS FREIRE, J. G.: vide ARAP, S.                                                                                                                                                                                                                                        |     |
| DEPPE, H.-U.: vide BICHLER, K. H.                                                                                                                                                                                                                                             |     |
| ESCALANTE, O.: vide BOYARSKI, S.                                                                                                                                                                                                                                              |     |
| FEUSTERL, A.; SCHÖNFELDER, M. und WOHLRAB, F.: Fermenthistochemische Untersuchungen an Prostatakarzinomen unter Therapieeinfluss – Histochemical Enzyme Studies of Prostatic Cancer Influenced by Therapy . . . . .                                                           | 77  |
| FURNARI, S.; PAVONE-MACALUSO, M.; VEROUX, G., and MATTEA, E.: Cancer Chemotherapy in Urology . . . . .                                                                                                                                                                        | 315 |

- GO, T.: vide TAKAYASU, H.  
 GRATZLOVÁ, J.: vide REVÚSOVÁ, V.  
 GREGOIR, W.: vide ARAP, S.  
 GYARMATHY, F.: vide VÁRY, L.  
 HAGEL, K.: vide SENGE, TH.  
 HAHN, M.: vide ALBRECHT, K. F.  
 HASCHEK, H. and PORPACZY, P.: 100 Jahre Urologie an der Wiener Poliklinik –  
 A Century of Urology at the Vienna Polyclinic . . . . . 397  
 HASSANEIN, KHATAB M.: vide BOULOS, BADI M.  
 HAUG, H. P.: vide NOVAK, D.  
 HEILBRON, D.: vide SWARTZBERG, J. E.  
 HILWEG, D.: vide NOVAK, D.  
 HIENZ, H. A.: vide SENGE, TH.  
 HINMAN, F. jr.: vide SWARTZBERG, J. E.  
 JANKNEGHT, R. A.: vide MOONEN, W. A.  
 KARÁTSOŇ, A.: vide VÁRY, L.  
 KELÁMI, A.: Experimentelle Untersuchungen mit Teflonfilz an der Harnblase des  
 Hundes: 4 Jahres-Spätergebnisse – Experimental Investigations with  
 Teflon Felt on the Urinary Bladder of the Dog: Four Years Late Results 142  
 KETTNER, A.: vide MELCHIOR, H.  
 KIERFELD, G.; MELLIN, P.; SCHWALM, E. und BREHMER, B.: Erfolgreiche Nieren-  
 konservierung bis zu 48 Stunden im Experiment am Miniaturschwein –  
 Successful Renal Conservation for 48 Hours in the Dwarf Swine . . . 196, 460  
 KIERFELD, G. und STROHMENGER, P.: Ersatz von Harnleiterdefekten mit Hilfe der  
 «offenen Harnleiterregeneration» – Repair of Ureteral Defects Using  
 'Open Ureteral Regeneration' . . . . . 336  
 KOCIS, J.; LÁSZLÓ, F. A.; CSERNAY, L., and KOVÁCS, K.: Renal Circulation in  
 Rats Treated with Hexadimethrine Bromide . . . . . 269  
 KOVÁCS, K.: vide KOCIS, J.  
 LABAY, P.: vide BOYARSKI, S.  
 LÁSZLÓ, F. A.: vide KOCIS, J.  
 LIPSKY, H.: Blasenentzündung und vesikoureteraler Reflux. Tierexperimentelle  
 Untersuchungen. – Bladder Inflammation and Vesicoureteral Reflux,  
 Animal Experimental Studies. . . . . 217  
 LUBIN, E.: vide LURIE, A.  
 LURIE, A.; SAVIR, A., and LUBIN, E.: Non-Fused Crossed Renal Ectopia Verified  
 by Radioisotope Scanning and Agenesis of the Vas Deferens on the  
 Ipsilateral Side . . . . . 45  
 MATTEA, E.: vide FURNARI, S.  
 MELCHIOR, H.; TERHORST, B. und KETTNER, A.: Die medikamentöse Behandlung  
 des Harnsteinleidens. I. Spasmolyse und Analgesie – The Treatment of  
 Urocalculosis by Medication – I. Spasmolysis and Analgesia. . . . . 367  
 MELLIN, P.: vide KIERFELD, G.  
 MEWE, F.: vide BICHLER, K. H.  
 MOONEN, W. A. und JANKNEGHT, R. A.: Urologische Aspekte urogenitaler Fisteln  
 bei der Frau – Urologic Aspects of Urogenital Fistulae in Women . . . 303  
 NAGAMATSU, G. R.: see OKADA, K.

|                                                                                                                                                                                                                                                                      |     |
|----------------------------------------------------------------------------------------------------------------------------------------------------------------------------------------------------------------------------------------------------------------------|-----|
| NOVAK, D.; HILWEG, D., and HAUG, H. P.: The Role of Roentgenographic Procedures in Staging of Carcinoma of the Urinary Bladder by TNM System                                                                                                                         | 149 |
| OKADA, K. and NAGAMATSU, G. R.: The Significance of Electron Microscopy in Urological Kidney Diseases . . . . .                                                                                                                                                      | 112 |
| PÁNYKÓ, E.: vide VÁRY, L.                                                                                                                                                                                                                                            |     |
| PATAKY, L.: vide VÁRY, L.                                                                                                                                                                                                                                            |     |
| PUIGVERT, A.: Surgical Treatment of Urinary Incontinence in the Male . . . . .                                                                                                                                                                                       | 261 |
| PAVONE-MACALUSO, M.; CARAMIA, G., and RIZZO, F. P.: The Use of Chemotherapeutic Agents in the Prophylaxis of Papillary Bladder Tumours . .                                                                                                                           | 379 |
| PAVONE-MACALUSO, M.: vide FURNARI, S.                                                                                                                                                                                                                                |     |
| RAM, M.: Intermittent Irrigation as Treatment of Neurogenic Bladder. . . . .                                                                                                                                                                                         | 65  |
| REVÚSOVÁ, V.; ZVARA, V., and GRATZLOVÁ, J.: Urinary Oxalate Excretion in Patients with Urolithiasis . . . . .                                                                                                                                                        | 277 |
| RICHTER, K.-D.: vide SENGE, TH.                                                                                                                                                                                                                                      |     |
| RIZZO, F. P.: vide PAVONE-MACALUSO, M.                                                                                                                                                                                                                               |     |
| RUTISHAUSER, G.: vide SCHOENENBERGER, G. A.                                                                                                                                                                                                                          |     |
| SALLAI, Zs.: vide VÁRY, L.                                                                                                                                                                                                                                           |     |
| SAVIR, A.: vide LURIE, A.                                                                                                                                                                                                                                            |     |
| SCHAEER, H. P.: vide SCHOENENBERGER, G. A.                                                                                                                                                                                                                           |     |
| SCHENCK, K.: vide BICHLER, K. H.                                                                                                                                                                                                                                     |     |
| SCHOENENBERGER, G. A.; RUTISHAUSER, G.; CUENI, L. B.; BAUER, U., and SCHAER, H. P.: Postural Dependent Activity Changes of Urinary LDH as a Diagnostic Aid in Nephroptosis. . . . .                                                                                  | 105 |
| SCHÖNFELDER, M.: vide FEUSTEL, A.                                                                                                                                                                                                                                    |     |
| SCHWALM, E.: vide KIERFELD, G.                                                                                                                                                                                                                                       |     |
| SELYE, H.: vide SZABO, S.                                                                                                                                                                                                                                            |     |
| SENGE, TH.; RICHTER, K.-D.; HIENZ, H. A. and HAGEL, K.: Verpflanzung von menschlichem Prostataadenomgewebe in die vordere Augenkammer männlicher Meerschweinchen – Implantation of Human Prostatic Adenoma-tissues in the Anterior Chamber of Eye of Male Guinea Pig | 72  |
| SHISHITO, S. and WATANABE, H.: Postoperative Course and Treatment in Adrenal Surgery I. Electrolyte Balance and Supplement in Primary Aldosteronism                                                                                                                  | 1   |
| SHISHITO, S. and WATANABE, H.: Postoperative Course and Treatment in Adrenal Surgery. II. Cushing's Syndrome and Pheochromocytoma . . . . .                                                                                                                          | 13  |
| STROHMENGER, P.: vide KIERFELD, G.                                                                                                                                                                                                                                   |     |
| SWARTZBERG, J. E.; HEILBRON, D., and HINMAN, F., jr.: Disuse and Increased Function of the Dog Ureter. II. Effect on Length . . . . .                                                                                                                                | 51  |
| SZABO, S. and SELYE, H.: Inhibition by Hypophysectomy of Nephrocalcinosis Produced by Mercuric Chloride. . . . .                                                                                                                                                     | 39  |
| TAKAYASU, H.; ASO, Y.; TAKAGI, T., and Go, T.: Clinical Application of Fiber-Optic Pyeloureteroscope . . . . .                                                                                                                                                       | 97  |
| TAKAGI, T.: vide TAKAYASU, H.                                                                                                                                                                                                                                        |     |
| TERHORST, B.: vide MELCHIOR, H.                                                                                                                                                                                                                                      |     |
| TIMM, G. W.: vide BRADLEY, W. E.                                                                                                                                                                                                                                     |     |
| TRABUCCO, A. E.: Anatomic-clinical Study of the Adrenals in Nephrosclerosis . .                                                                                                                                                                                      | 24  |
| VAN REGEMORTER, G.: vide ARAP, S.                                                                                                                                                                                                                                    |     |

|                                                                                                                                                                                                                                                                                                                                       |     |
|---------------------------------------------------------------------------------------------------------------------------------------------------------------------------------------------------------------------------------------------------------------------------------------------------------------------------------------|-----|
| VÁRY, L.; KARÁTON, A.; BOCHKOR, B.; WABROSC, G.; GYARMATHY, F.; BÁRD, R.; PÁNYKÓ, E.; SALLAI, Zs.; PATAKY, L.; ASZTALOS, B. und BALOGH, F.: Das Klinikum des Peniskrebses. Statistische Analyse aus einem Sammelmaterial – Clinical Experiences on the Carcinoma of the Penis. Statistical Analysis of a Collected Material . . . . . | 171 |
| VEROUX, G.: vide FURNARI, S.                                                                                                                                                                                                                                                                                                          |     |
| WABROSC, G.: vide VÁRY, L.                                                                                                                                                                                                                                                                                                            |     |
| WAGENKNECHT, L. V. and AUVERT, J.: Symptoms and Diagnosis of Retroperitoneal Fibrosis. Analysis of 31 Cases . . . . .                                                                                                                                                                                                                 | 185 |
| WATANABE, H.: vide SHISHITO, S.                                                                                                                                                                                                                                                                                                       |     |
| WILLIAMS, D. I.: The Natural History of Reflux – A Review . . . . .                                                                                                                                                                                                                                                                   | 350 |
| WOHLRAB, F.: vide FEUSTEL, A.                                                                                                                                                                                                                                                                                                         |     |
| ZVARA, V.: vide REVÚSOVÁ, V.                                                                                                                                                                                                                                                                                                          |     |

Proceedings · Verhandlungsberichte · Congrès

|                                                                                                                                                                                                                                                                               |         |
|-------------------------------------------------------------------------------------------------------------------------------------------------------------------------------------------------------------------------------------------------------------------------------|---------|
| III. Monographic Course on Tumors of the Bladder, Madrid, October 26–31, 1970 . . . . .                                                                                                                                                                                       | 388     |
| Diskussionstage anlässlich des 100jährigen Bestehens der Urologie an der Allgemeinen Poliklinik der Stadt Wien, 28. April–1. Mai 1971 – Discussions held on the Occasion of the Centenary of the Urology Department at the General Polyclinic of Vienna, April 28–May 1, 1971 | 410     |
| Book Reviews . . . . .                                                                                                                                                                                                                                                        | 94, 321 |
| Congresses . . . . .                                                                                                                                                                                                                                                          | 96, 184 |
| Subject Index . . . . .                                                                                                                                                                                                                                                       | 458     |
